# Supplementary material for: Electrocatalytic oxygen reduction kinetics on Fe-center of nitrogen-doped graphene
Source: Royal Society of Chemistry journal article supplement (doi:10.1039/c4cp00037d), 2014-01-01
Supplement: c4cp00037d1.pdf [file c4cp00037d1.pdf]

## Electrocatalytic Oxygen Reduction Kinetics on Fe-center of Nitrogen-doped Graphene

Jing Sun<sup>a</sup>, Ya-Hui Fang<sup>a,b</sup> and Zhi-Pan Liu<sup>a\*</sup>

<sup>a</sup>Shanghai Key Laboratory of Molecular Catalysis and Innovative Materials, Key Laboratory of Computational Physical Science (Ministry of Education), Department of Chemistry, Fudan University, Shanghai 200433, China

<sup>b</sup>School of Chemical and Environmental Engineering, Shanghai Institute of Technology, Shanghai 201418, China

\*E-mail address: [zpliu@fudan.edu.cn](mailto:zpliu@fudan.edu.cn) (Z.-P. Liu).

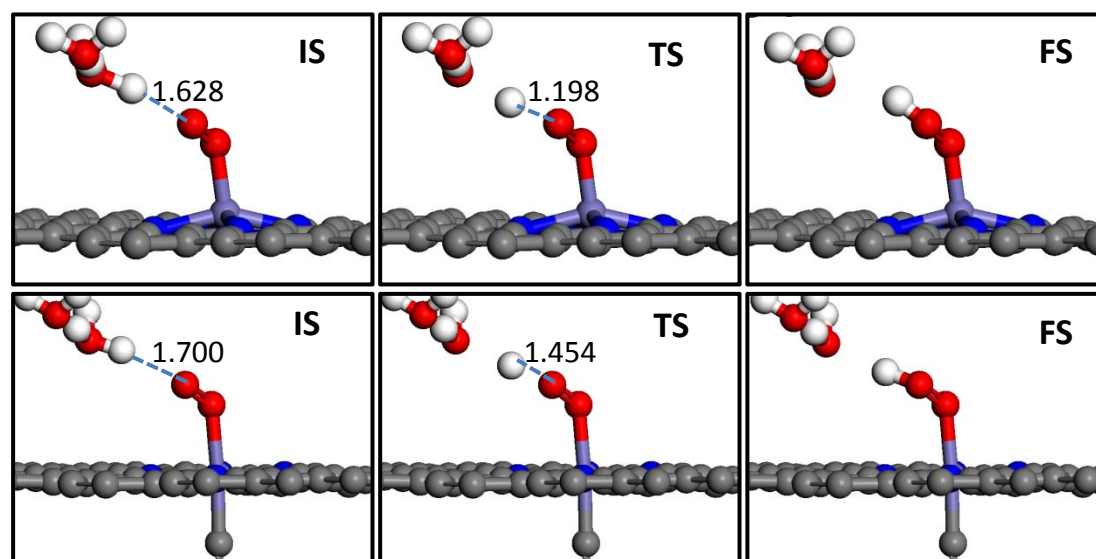

**Figure S1.** The IS, TS and FS structures of O<sub>2</sub> hydrogenation step. (O<sub>2</sub>\*+H<sup>+</sup>+e<sup>-</sup>→OOH\*) on FeN<sub>4</sub> (top panel) and Fe(CN)N<sub>4</sub> (bottom panel). The labeled distances are in angstroms. The grey, blue, red and purple balls represent C, N, O and Fe, respectively.

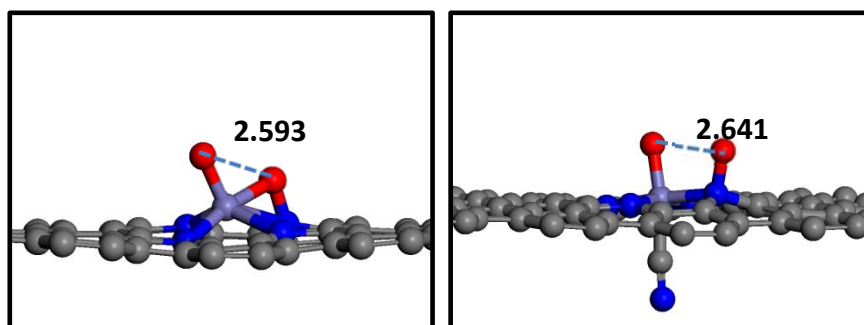

**Figure S2** The dissociated O atoms on FeN<sub>4</sub> (Left) and on Fe(CN)N<sub>4</sub> (Right) at 0.8 V condition. The labeled distances are in angstroms. The grey, blue, red and purple balls represent C, N, O and Fe, respectively

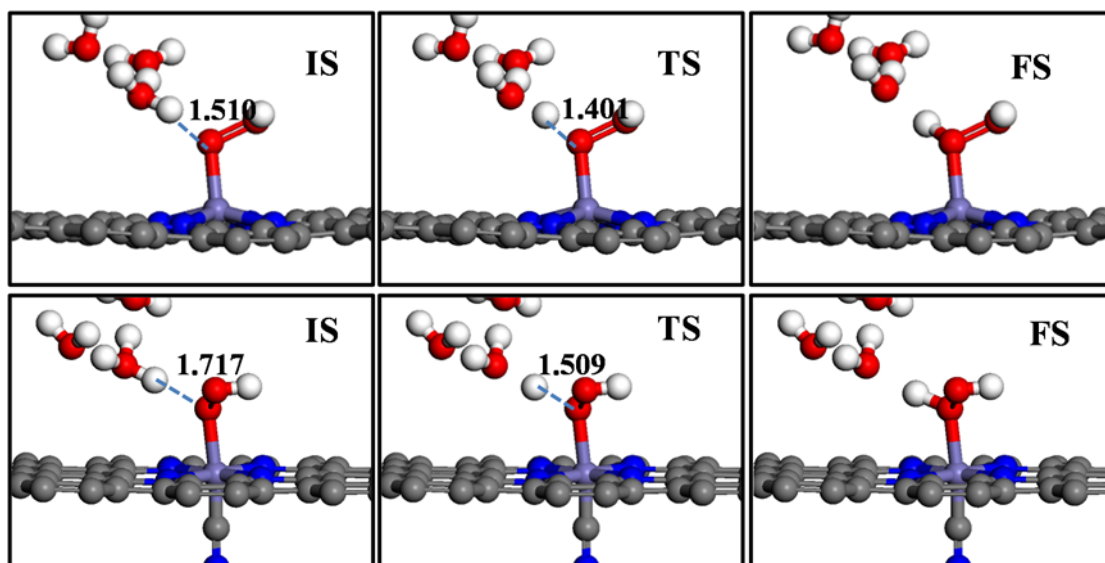

**Figure S3.** The IS, TS and FS structures for the OOH hydrogenation to H<sub>2</sub>O<sub>2</sub> step (OOH\*+H<sup>+</sup>+e<sup>-</sup>→HOOH\*) on FeN<sub>4</sub> (top panel) and Fe(CN)N<sub>4</sub> (bottom panel). The labeled distances are in angstroms.

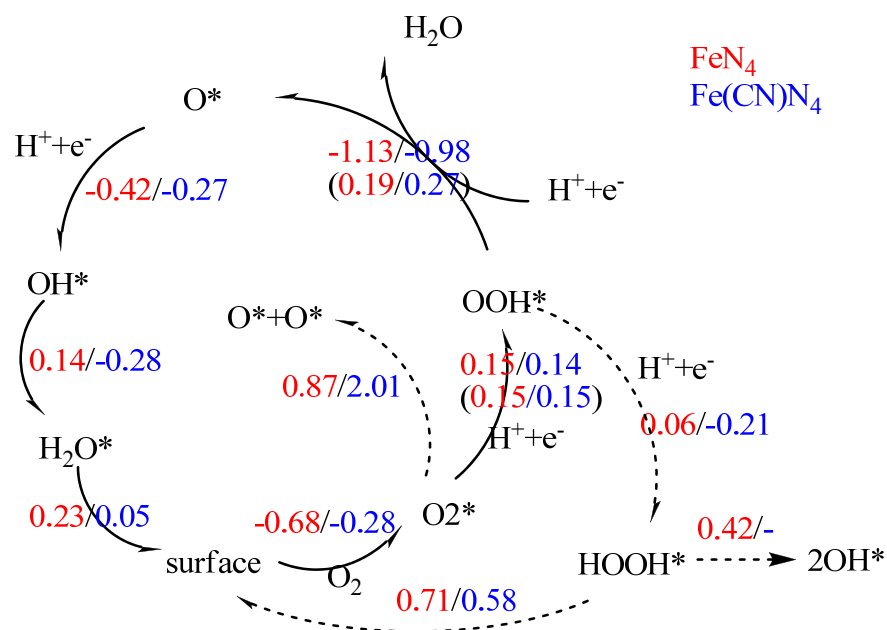

**Figure S4:** The complete mechanism of  $\text{O}_2$  reduction on the two FeN sites. Indicated data are the free energy change of the reaction step at 0.8 V vs. SHE. The values in parentheses are the free energy barrier of the key elementary reactions. For the color of the data, Red represents  $\text{FeN}_4$  site and blue for  $\text{Fe(CN)N}_4$  site.
